# Supplementary material for: Synthesis of core–shell Au–Pt nanodendrites with high catalytic performance via overgrowth of platinum on in situ gold nanoparticles
Source: Royal Society of Chemistry journal article supplement (doi:10.1039/c4ta04940c), 2014-11-06
Supplement: c4ta04940c1.pdf [file c4ta04940c1.pdf]

## Electronic Supplementary Information

### Synthesis of Core-Shell Au-Pt Nanodendrites with High Catalytic Performance *via* Overgrowth of Platinum on *in situ* Gold Nanoparticles

Yijing Li,<sup>†</sup> Wenchao Ding,<sup>†</sup> Mingrui Li,<sup>†</sup> Haibing Xia,<sup>‡,\*</sup> Dayang Wang<sup>‡</sup> and Xutang Tao<sup>†</sup>

<sup>†</sup>State Key Laboratory of Crystal Materials, Shandong University, Jinan, 250100, P. R China;

<sup>‡</sup>Ian Wark Research Institute, University of South Australia, Adelaide, SA 5095, Australia.

**Figure S1.** HRTEM images of Pt nanobranches on CS Au-Pt<sub>5</sub> NDs with defects (such as atomic steps, kinks, and corner atoms). The concentrations of K<sub>2</sub>PtCl<sub>4</sub>, HAuCl<sub>4</sub>, citrate and AA are 3.6, 0.70, 3.0 and 29.4 mM, respectively. The molar ratios of Pt-to-Au and AA-to-Pt are 5.0 and 8.0, respectively.

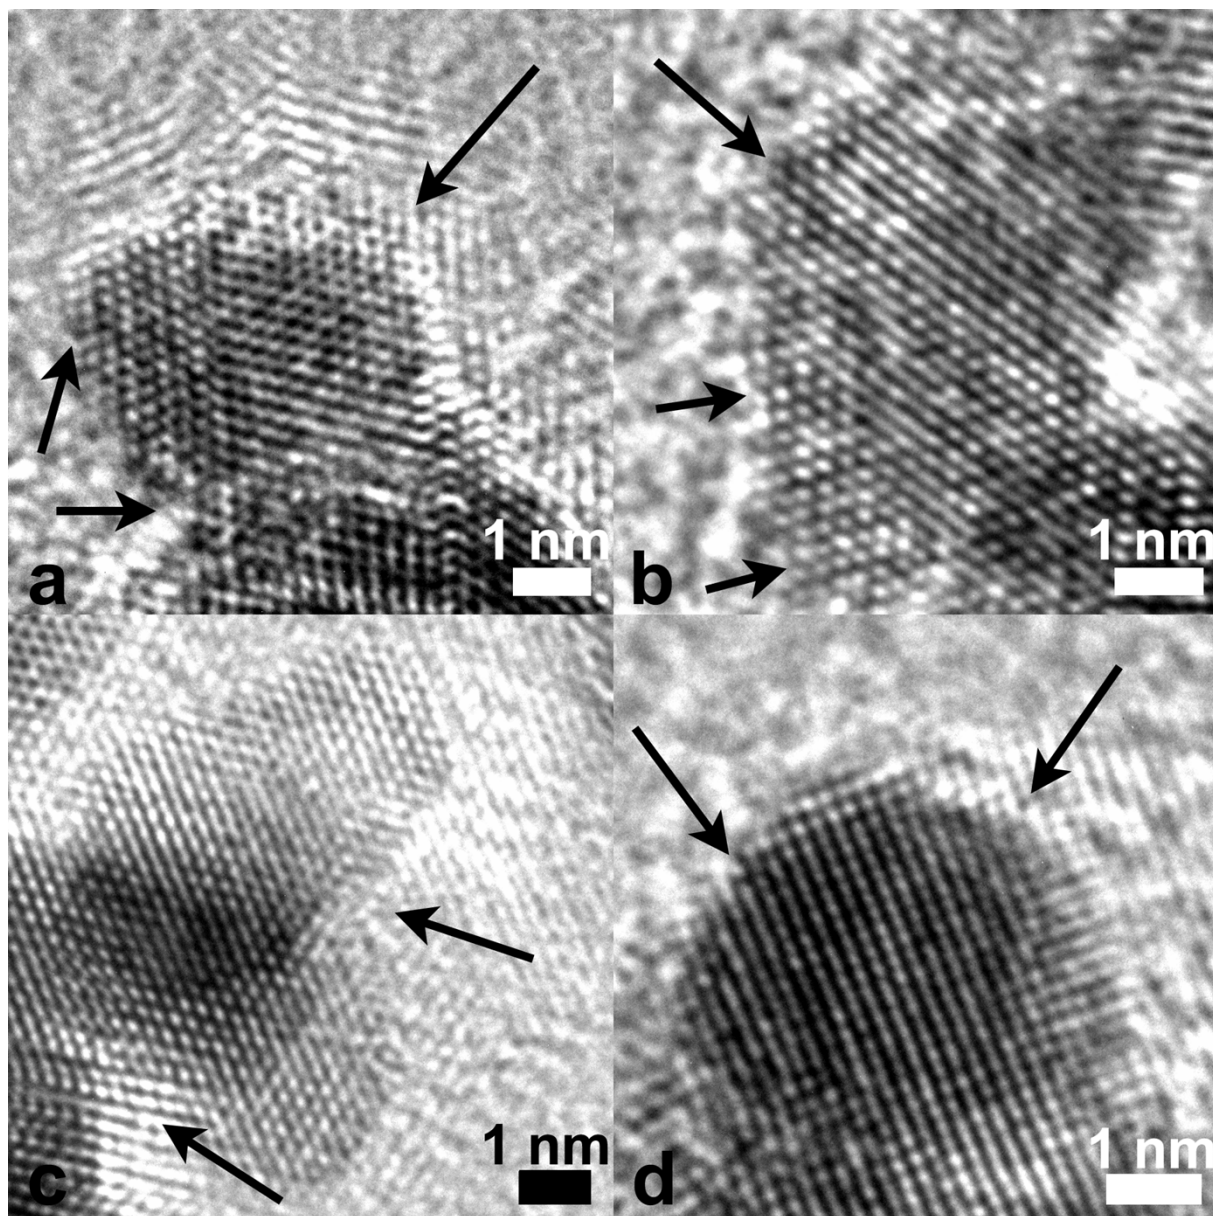

**Figure S2.** Selected area electron diffraction (SAED) pattern of the Au-Pt<sub>5</sub> NDs obtained. The concentrations of K<sub>2</sub>PtCl<sub>4</sub>, HAuCl<sub>4</sub>, citrate and AA are 3.6, 0.70, 3.0 and 29.4 mM, respectively. The molar ratios of Pt-to-Au and AA-to-Pt are 5.0 and 8.0, respectively.

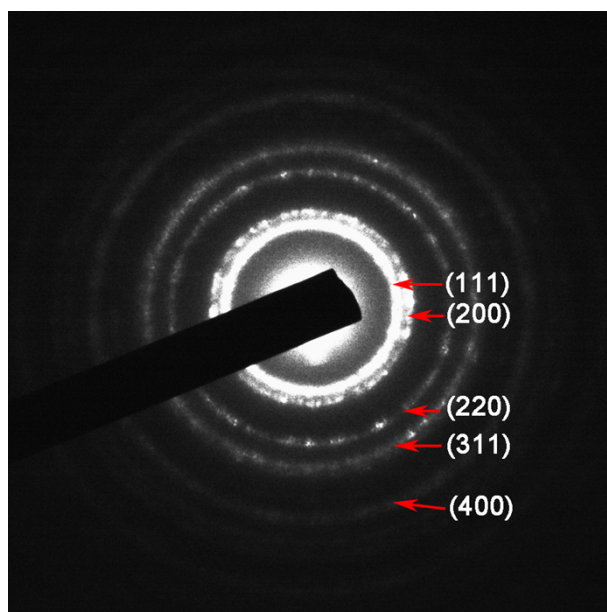

**Figure S3.** HAADF-STEM-EDS mapping images of the Au-Pt<sub>5</sub> NDs obtained. The concentrations of K<sub>2</sub>PtCl<sub>4</sub>, HAuCl<sub>4</sub>, citrate and AA are 3.6, 0.70, 3.0 and 29.4 mM, respectively. The molar ratios of Pt-to-Au and AA-to-Pt are 5.0 and 8.0, respectively.

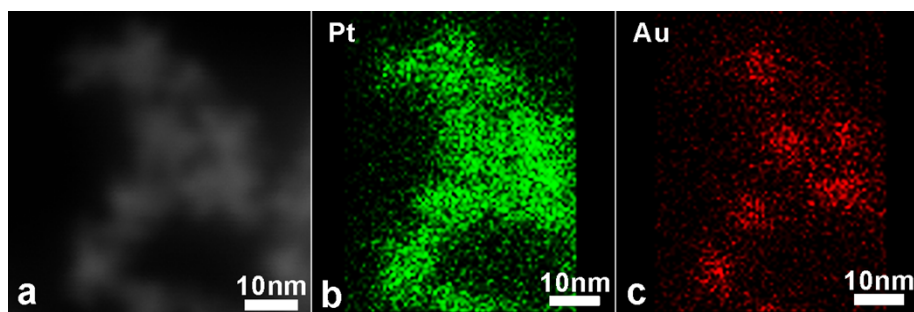

**Figure S4.** TEM images of other Au-Pt NDs obtained with incubation time of 9 min (a) and 18 min (b). The concentrations of  $\text{K}_2\text{PtCl}_4$ ,  $\text{HAuCl}_4$ , citrate and AA are 3.6, 0.70, 3.0 and 29.4 mM, respectively. The molar ratios of Pt-to-Au and AA-to-Pt are 5.0 and 8.0, respectively.

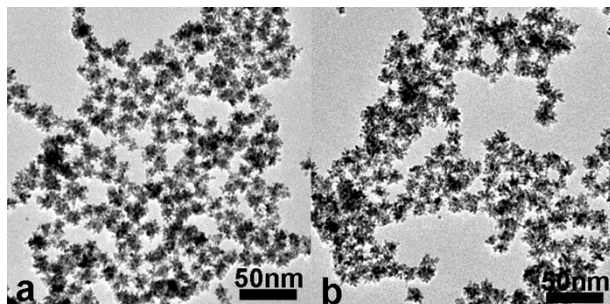

**Figure S5.** TEM image of nanowire-like Au crystals extracted from the citrate-HAuCl<sub>4</sub>-K<sub>2</sub>PtCl<sub>6</sub> solution with incubation time of 11 min. The final concentrations of K<sub>2</sub>PtCl<sub>6</sub>, HAuCl<sub>4</sub> and citrate are 4.2, 0.83 and 3.4 mM, respectively. The Pt-to-Au molar ratio is 5.0.

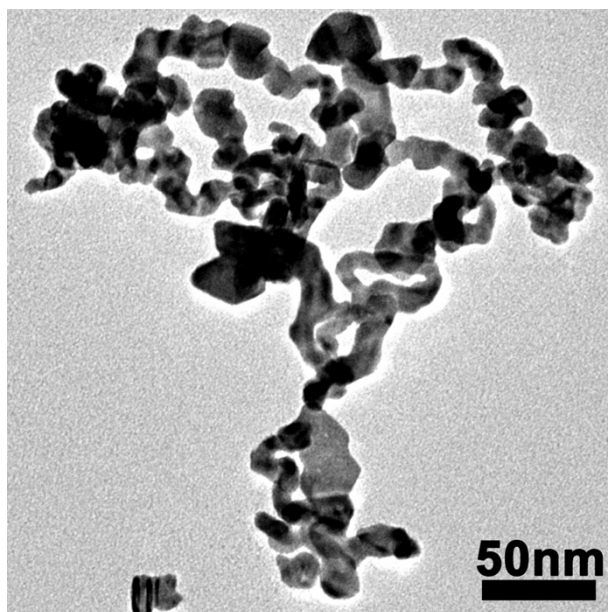

**Figure S6.** TEM image of the hyperbranched Pt particles prepared according to the literature. The concentrations of  $\text{K}_2\text{PtCl}_4$  and AA are 12.5 mM and 50.0 mM, respectively.

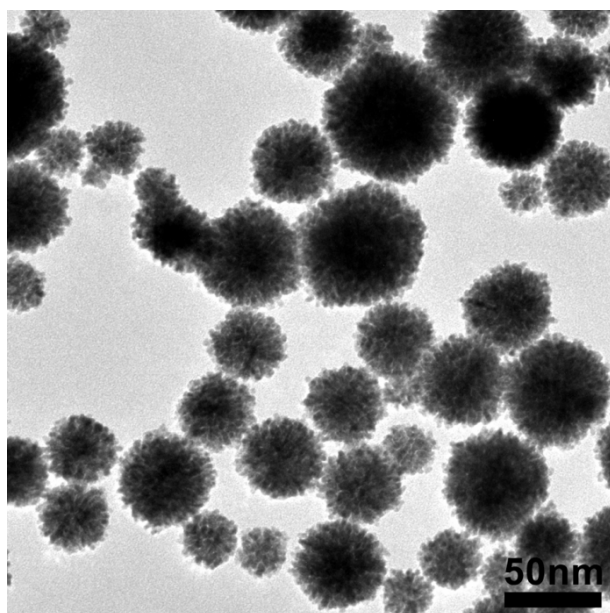

**Figure S7.** CV curves of GCEs modified by commercial Pt black (a, black curve), hyperbranched Pt nanoparticles (b, red curve), and Au-Pt<sub>5</sub> NDs (c, blue curve) measured in 0.50 M H<sub>2</sub>SO<sub>4</sub> solution in the presence of 1.0 M methanol. The scan rate is 20 mV s<sup>-1</sup>. The currents are normalized by the ECSA values.

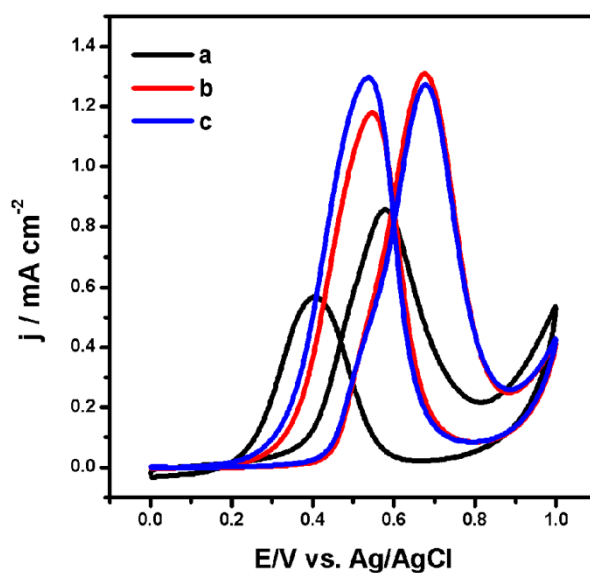



**Figure S8.** Pt 4f XPS spectra of spherical hyperbranched Pt particles (a) and CS Au-Pt<sub>5</sub> NDs (b).

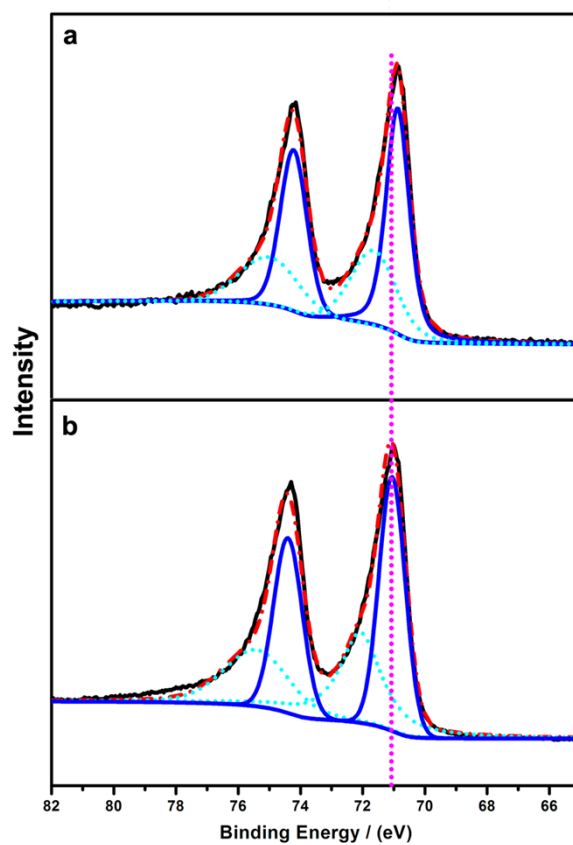

**Figure S9.** (A) Cyclic voltammograms of GCE modified by commercial Pt black (a, black curve), hyperbranched Pt nanoparticles (b, red curve), and Au-Pt<sub>5</sub> NPs (c, blue curve) measured in 0.10 M H<sub>2</sub>SO<sub>4</sub> solution after immersion in CO saturated 0.1 M H<sub>2</sub>SO<sub>4</sub> for 10 min at a potential of -0.2 V. (B) Cyclic voltammograms of GCE modified by Au-Pt<sub>2.5</sub> particles (a, black curve), Au-Pt<sub>4</sub> NPs (b, red curve), Au-Pt<sub>5</sub> NPs (c, blue curve), and Au-Pt<sub>6</sub> NPs (d, magenta curve) measured in 0.10 M H<sub>2</sub>SO<sub>4</sub> solution after immersion in CO saturated 0.1 M H<sub>2</sub>SO<sub>4</sub> for 10 min at a potential of -0.2 V. The scan rate is 50 mV s<sup>-1</sup>. The currents are normalized by the Pt mass loaded.

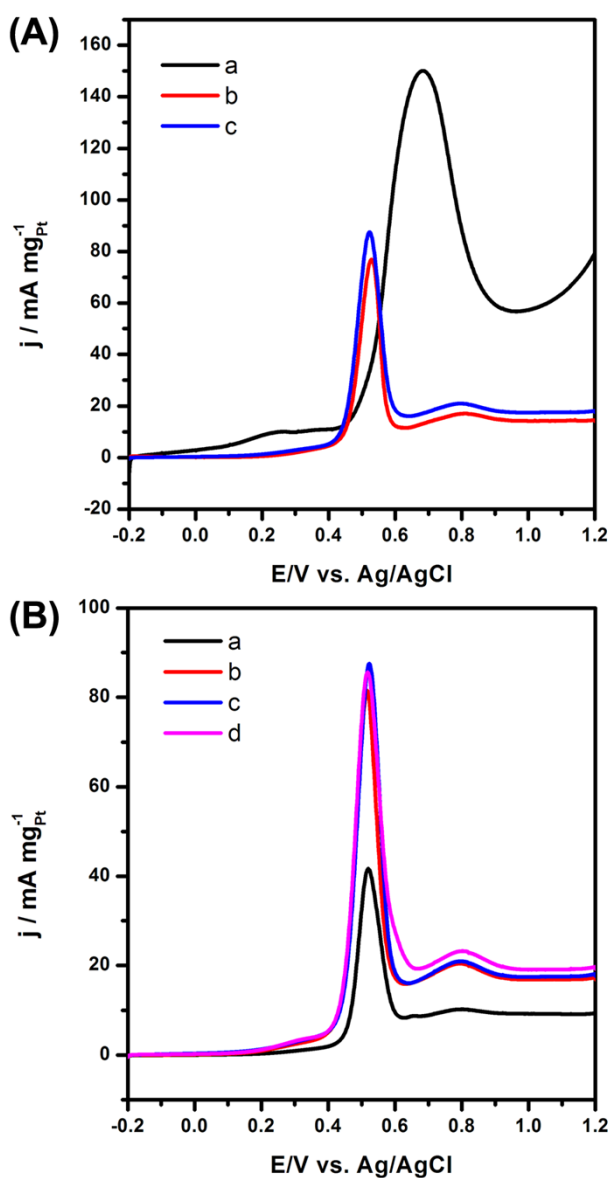

**Figure S10.** Potential cycling stability of MOR catalyzed by Pt black (a) and CS Au-Pt<sub>5</sub> NDs (b), measured in 0.5 M H<sub>2</sub>SO<sub>4</sub> in presence of 1.0 M methanol solution. The scan rate is 50 mV s<sup>-1</sup>.

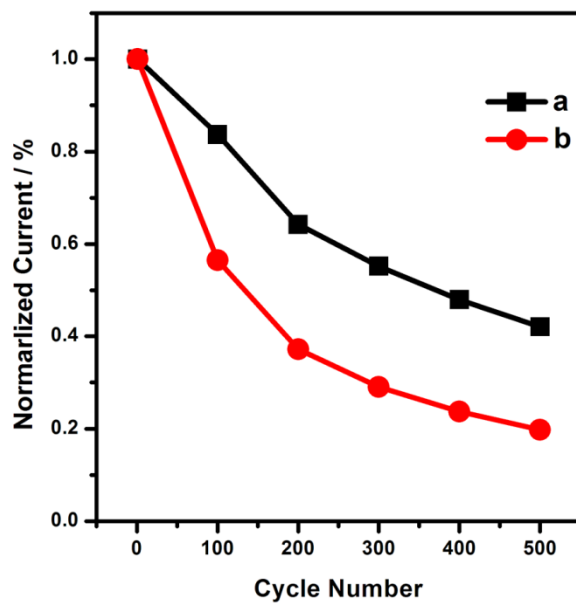

**Figure S11.** TEM image of CS Au-Pt<sub>5</sub> NDs after cycling stability test.

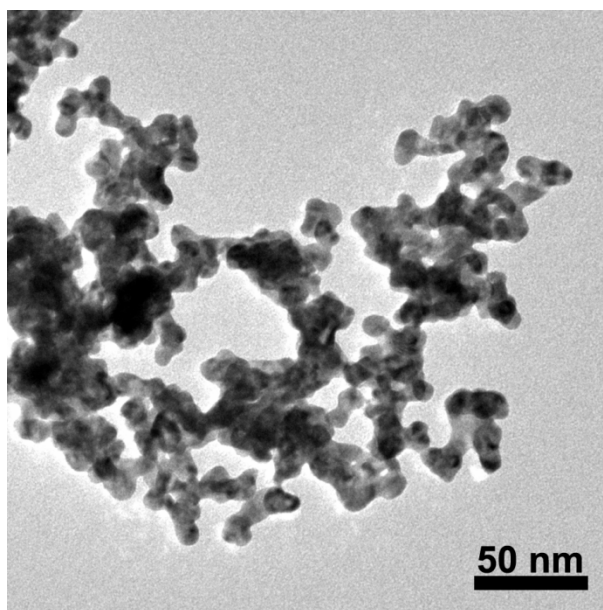

**Table S1.** Summary of the redox potential values of half-reaction of  $\text{AuCl}_4^-/\text{Au}^0$  and  $\text{PtCl}_6^{2-}/\text{PtCl}_4^{2-}$ .

| Half-reaction                                                                      | Potential values (V) |
|------------------------------------------------------------------------------------|----------------------|
| $\text{AuCl}_4^- + 3\text{e} \leftrightarrow \text{Au}^0 + 4\text{Cl}^-$           | 1.002                |
| $\text{PtCl}_6^{2-} + 2\text{e} \leftrightarrow \text{PtCl}_4^{2-} + 2\text{Cl}^-$ | 0.68                 |

**Table S2.** Summary of ECSAs, current densities normalized by mass and current densities normalized by ECSA of GCE modified by Au-Pt<sub>m</sub> products with different Pt-to-Au molar ratios. The AA-to-Pt molar ratio is 8.0.

| <b>Pt-to-Au<br/>molar<br/>ratio</b> | <b>ECSA<br/>[m<sup>2</sup> g<sup>-1</sup>]</b> | <b>Mass activity<br/>[A mg<sup>-1</sup>]</b> | <b>Specific activity<br/>[mA cm<sup>-2</sup>]</b> |
|-------------------------------------|------------------------------------------------|----------------------------------------------|---------------------------------------------------|
| 1                                   | 22.2                                           | 0.13                                         | 0.57                                              |
| 2.5                                 | 25.3                                           | 0.29                                         | 1.13                                              |
| 4                                   | 30.3                                           | 0.35                                         | 1.14                                              |
| 5                                   | 35.2                                           | 0.45                                         | 1.27                                              |
| 6                                   | 34.3                                           | 0.40                                         | 1.16                                              |

**Table S3.** Summary of the lengths and widths of the branches on Au-Pt<sub>5</sub> nanodendrites prepared under different AA-to-Pt molar ratios. The concentrations of K<sub>2</sub>PtCl<sub>4</sub>, HAuCl<sub>4</sub>, citrate and AA are 3.6, 0.70, 3.0 and 29.4 mM, respectively. The Pt-to-Au molar ratio is 5.0.

| <b>AA-to-Pt<br/>molar ratio</b> | <b>2/1</b> | <b>4/1</b> | <b>8/1</b> |
|---------------------------------|------------|------------|------------|
| Length (nm)                     | 3.7        | 3.8        | 4.2        |
| Width (nm)                      | 2.8        | 2.6        | 2.6        |
